# Supplementary material for: Sarm1 deletion suppresses TDP-43-linked motor neuron degeneration and cortical spine loss
Source: Springer Nature journal article supplement (doi:10.1186/s40478-019-0800-9), 2019-10-28
Supplement: MOESM1 [file 25666920]

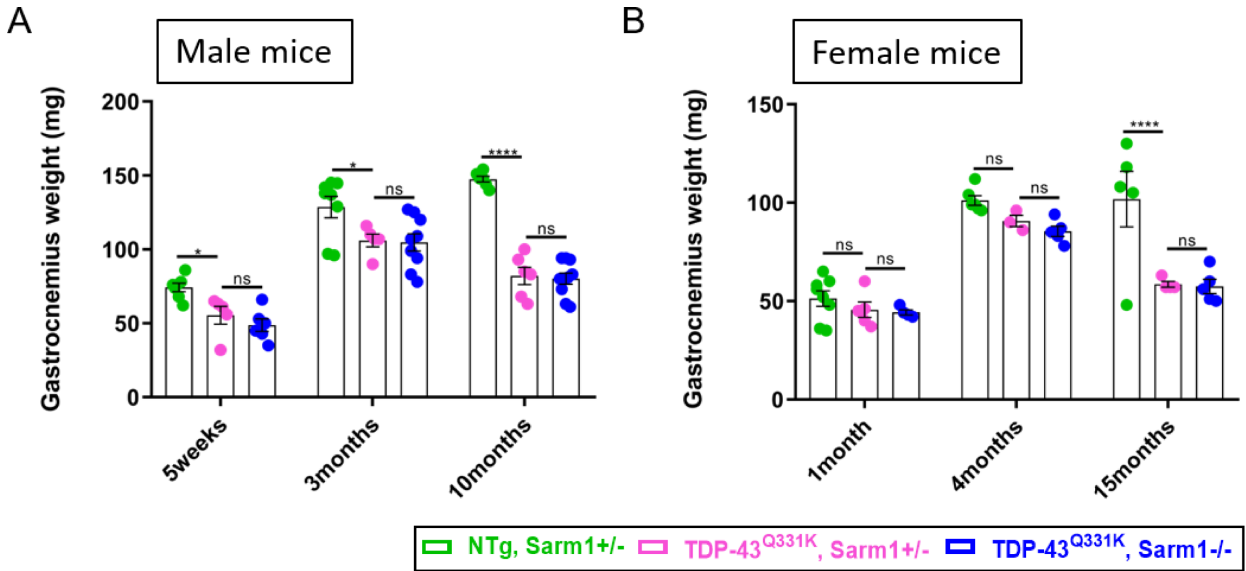

### Additional file 1 Gastrocnemius muscle weights in male and female mice

**A.** Gastrocnemius muscle weights of male mice at different time points (n=6-8 NTG; n=5-6 Q331K-*Sarm1*<sup>+/-</sup>; n=6-10 Q331K-*Sarm1*<sup>-/-</sup>). ANOVA Interaction P<0.0001. Pairwise comparisons: 5 weeks, NTG vs. Q331K-*Sarm1*<sup>+/-</sup>: \* P=0.0427; Q331K-*Sarm1*<sup>+/-</sup> vs. Q331K-*Sarm1*<sup>-/-</sup>: ns P=0.4180; 3 months, NTG vs. Q331K-*Sarm1*<sup>+/-</sup>: \* P=0.0106; Q331K-*Sarm1*<sup>+/-</sup> vs. Q331K-*Sarm1*<sup>-/-</sup>: ns P=0.8614; 10 months, Q331K-*Sarm1*<sup>+/-</sup> vs. Q331K-*Sarm1*<sup>-/-</sup>: ns P=0.7990.

**B.** Gastrocnemius muscle weights of female mice at different time points (n=5-8 NTG; n=3-5 Q331K-*Sarm1*<sup>+/-</sup>; n=4-5 Q331K-*Sarm1*<sup>-/-</sup>). ANOVA Interaction P=0.0063. Pairwise comparisons: 1 month, NTG vs. Q331K-*Sarm1*<sup>+/-</sup>: ns P=0.7560; Q331K-*Sarm1*<sup>+/-</sup> vs. Q331K-*Sarm1*<sup>-/-</sup>: ns P=0.8753; 4 months, NTG vs. Q331K-*Sarm1*<sup>+/-</sup>: ns P=0.4391; Q331K-*Sarm1*<sup>+/-</sup> vs. Q331K-*Sarm1*<sup>-/-</sup>: ns P=0.5745; 15 months, Q331K-*Sarm1*<sup>+/-</sup> vs. Q331K-*Sarm1*<sup>-/-</sup>: ns P=0.8982.

For (A-B) two-way ANOVA followed by Holm-Sidak *post-hoc* test for pairwise comparisons; \*\*\*\*P<0.0001; error bars represent mean ± s.e.m.
