# Supplementary material for: Sarm1 deletion suppresses TDP-43-linked motor neuron degeneration and cortical spine loss
Source: Springer Nature journal article supplement (doi:10.1186/s40478-019-0800-9), 2019-10-28
Supplement: MOESM2 [file 25666920]

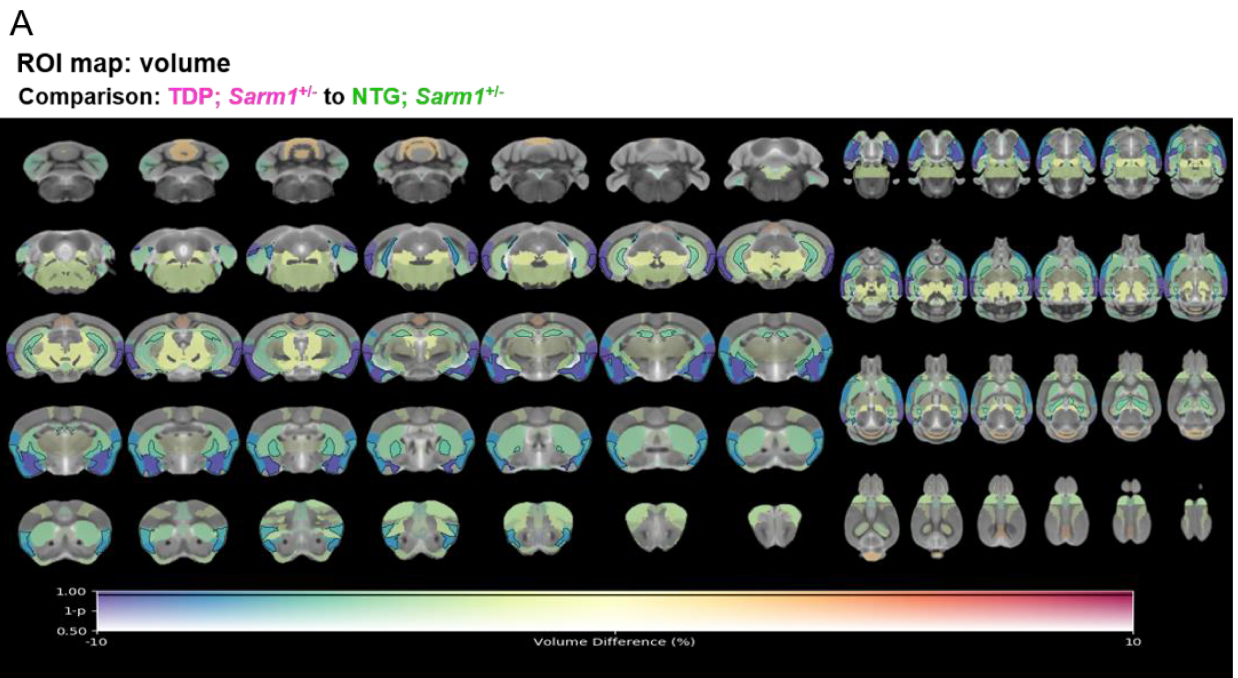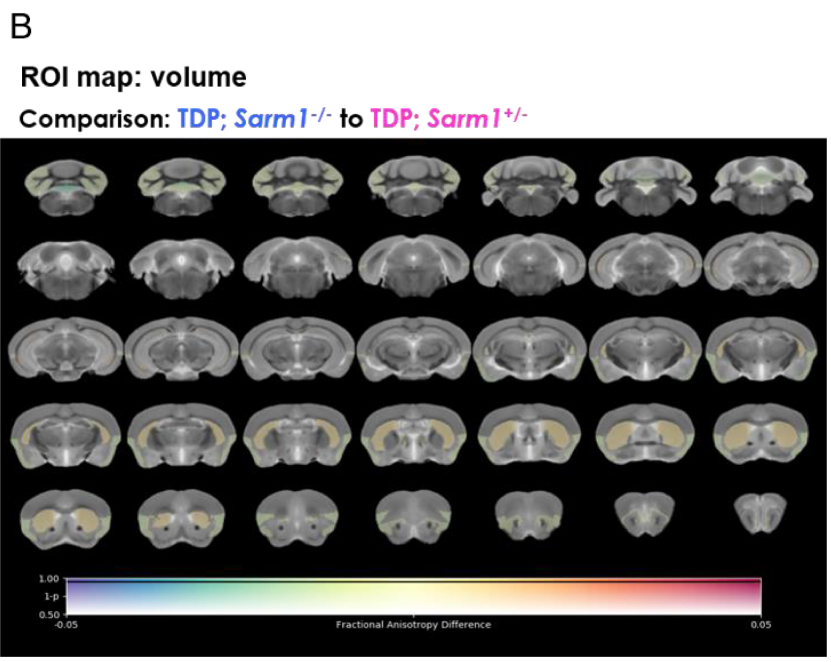

**Additional file 2 Additional MRI data**

**A-B.** MRI study-specific template (coronal and transverse) with an overlay representing ROI volume differences at 10 months of age (A) between Q331K-*Sarm1*<sup>+/-</sup> and NTG mice (B) between Q331K-*Sarm1*<sup>-/-</sup> and Q331K-*Sarm1*<sup>+/-</sup> mice. The colour of the overlay indicates the inter-group volume difference, while the transparency indicates the statistical significance. ROIs in which FWE-corrected p value <0.05 are contoured in black
