# Supplementary material for: Sarm1 deletion suppresses TDP-43-linked motor neuron degeneration and cortical spine loss
Source: Springer Nature journal article supplement (doi:10.1186/s40478-019-0800-9), 2019-10-28
Supplement: MOESM3 [file 25666920]

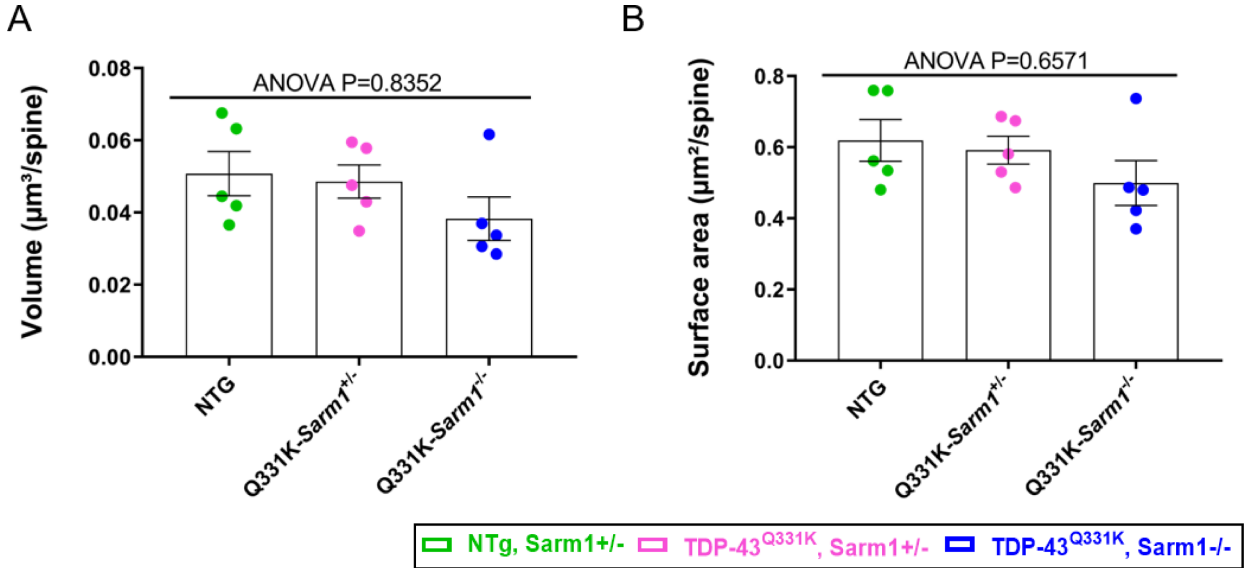

### Additional file 3 Dendritic spine morphology in motor cortex

**A.** Volume and **B.** Surface area of individual apical dendritic spines in motor cortex from mice at 10 months of age (n=5 mice per genotype). Spine volume ANOVA P=0.8352; spine surface area ANOVA P=6571; one-way ANOVA; error bars represent mean  $\pm$  s.e.m.
