# Supplementary material for: Sarm1 deletion suppresses TDP-43-linked motor neuron degeneration and cortical spine loss
Source: Springer Nature journal article supplement (doi:10.1186/s40478-019-0800-9), 2019-10-28
Supplement: MOESM4 [file 25666920]

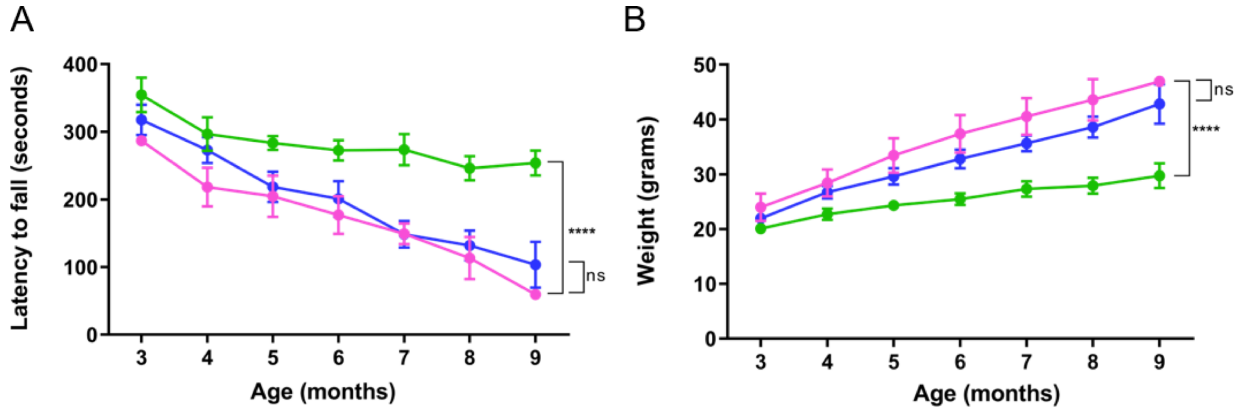

#### Additional file 4 Behavioural characterisation of female mice

**A.** Latency to fall of female transgenic mice on accelerating rotarod (n=4-10 NTG; n=3-12 Q331K-*Sarm1*<sup>+/-</sup>; n=5-12 Q331K-*Sarm1*<sup>-/-</sup> mice per genotype). Fixed effects (Age x Genotype) P=0.0232. Pairwise comparisons: Q331K-*Sarm1*<sup>+/-</sup> vs. Q331K-*Sarm1*<sup>-/-</sup>: ns P=0.2352. **B.** Weights of female mice (n=4-10 NTG; n=3-5 Q331K-*Sarm1*<sup>+/-</sup>; n=5-12 Q331K-*Sarm1*<sup>-/-</sup> mice per genotype). Fixed effects (Age x Genotype) P<0.0001. Pairwise comparisons: Q331K-*Sarm1*<sup>+/-</sup> vs. Q331K-*Sarm1*<sup>-/-</sup>: ns P=0.1248; two-way ANOVA followed by Holm-Sidak *post-hoc* test for pairwise comparisons. For (A-B) \*\*\*\*P<0.0001; error bars represent mean ± s.e.m.
