# Supplementary material for: Sarm1 deletion suppresses TDP-43-linked motor neuron degeneration and cortical spine loss
Source: Springer Nature journal article supplement (doi:10.1186/s40478-019-0800-9), 2019-10-28
Supplement: MOESM5 [file 25666920]

**Additional table 1 Results of ROI analyses of volume and FA changes in different brain regions comparing the mean of each genotype with that of every other group**

**Results of ROI analyses (Volume):**

| BRAIN REGIONS (VOLUME)                        | Volume diff (%)                   | FDR adjusted p value | Volume diff (%)                                          | FDR adjusted p value |
|-----------------------------------------------|-----------------------------------|----------------------|----------------------------------------------------------|----------------------|
|                                               | Q331K-Sarm1 <sup>+/-</sup> to NTG |                      | Q331K-Sarm1 <sup>-/-</sup> to Q331K-Sarm1 <sup>+/-</sup> |                      |
| DORSOLATERAL ENTORHINAL CORTEX                | -11.6538                          | 0.0223               | -3.3313                                                  | 0.9981               |
| VENTRAL NUCLEUS OF THE ENDOPIRIFORM CLAUSTRUM | -7.9053                           | 0.0300               | -2.1476                                                  | 0.9981               |
| DORSAL INTERMEDIATE ENTORHINAL CORTEX         | -10.1338                          | 0.0332               | -3.1552                                                  | 0.9981               |
| PODG                                          | -5.9565                           | 0.0387               | -0.0686                                                  | 0.9981               |
| GRDG                                          | -5.7484                           | 0.0332               | 0.3160                                                   | 1.0000               |
| ROSTRAL AMYGDALOPIRIFORM AREA                 | -11.8198                          | 0.0199               | 0.1169                                                   | 0.9981               |
| MODG                                          | -4.9296                           | 0.0332               | 0.0173                                                   | 0.9981               |
| PERIRHINAL CORTEX                             | -14.0439                          | 0.0395               | -2.0329                                                  | 0.9981               |
| AMYGDALA                                      | -9.7262                           | 0.0223               | -1.3559                                                  | 0.9981               |
| GLOBUS PALLIDUS                               | -5.8643                           | 0.0395               | 2.9526                                                   | 0.9981               |
| POSTEROLATERAL CORTICAL AMYGDALOID AREA       | -8.7475                           | 0.0199               | 0.9273                                                   | 0.9981               |
| CA3PY INNER                                   | -6.6886                           | 0.0332               | 1.7009                                                   | 0.9981               |
| PIRIFORM CORTEX                               | -7.6397                           | 0.0332               | 0.3921                                                   | 1.0000               |
| CLAUSTRUM: DORSAL PART                        | -9.6765                           | 0.0332               | 2.0760                                                   | 0.9981               |

|                                                   |          |        |         |        |
|---------------------------------------------------|----------|--------|---------|--------|
| <b>INSULAR REGION:<br/>NOT SUBDIVIDED</b>         | -6.7702  | 0.0332 | -0.3478 | 1.0000 |
| <b>AMYGDALOPIRIFORM<br/>TRANSITION AREA</b>       | -13.6769 | 0.0395 | 4.9936  | 0.9981 |
| <b>PRE-PARA<br/>SUBICULUM</b>                     | -7.7679  | 0.0465 | -0.6426 | 0.9981 |
| <b>MAMMILOTHALAMIC<br/>TRACT</b>                  | -1.5175  | 0.2651 | -3.4164 | 0.9981 |
| <b>STRIATUM</b>                                   | -4.6261  | 0.1235 | -0.6352 | 1.0000 |
| <b>CAUDOMEDIAL<br/>ENTORHINAL<br/>CORTEX</b>      | -4.4692  | 0.1561 | -2.3356 | 0.9981 |
| <b>ECTORHINAL<br/>CORTEX</b>                      | -10.8688 | 0.0642 | 2.5069  | 0.9981 |
| <b>DORSAL NUCLEUS<br/>OF THE<br/>ENDOPIRIFORM</b> | -7.1351  | 0.1101 | 0.3102  | 0.9981 |
| <b>SUBICULUM</b>                                  | -3.7538  | 0.1561 | 0.2727  | 0.9981 |

**Results of ROI analyses (FA):**

| <b>BRAIN REGIONS (FA)</b>                          | <b>FA diff (%)</b>                      | <b>FDR adjusted p value</b> | <b>FA diff (%)</b>                                            | <b>FDR adjusted p value</b> |
|----------------------------------------------------|-----------------------------------------|-----------------------------|---------------------------------------------------------------|-----------------------------|
|                                                    | <b>Q331K-Sarm1<sup>+/-</sup> to NTG</b> |                             | <b>Q331K-Sarm1<sup>+/-</sup> to Q331K-Sarm1<sup>+/-</sup></b> |                             |
| <b>ANTERIOR<br/>COMMISSURE: PARS<br/>POSTERIOR</b> | -4.0999                                 | 0.0447                      | 0.6890                                                        | 0.6975                      |
| <b>CEREBRAL<br/>PEDUNCLE</b>                       | -2.4513                                 | 0.0447                      | -0.0298                                                       | 0.8237                      |
| <b>TEMPORAL<br/>ASSOCIATION AREA</b>               | 2.0450                                  | 0.0449                      | -0.7689                                                       | 0.7262                      |
| <b>ECTORHINAL<br/>CORTEX</b>                       | 2.1129                                  | 0.0449                      | -0.9783                                                       | 0.7575                      |
| <b>STRIA TERMINALIS</b>                            | -3.2239                                 | 0.0457                      | 0.4587                                                        | 0.9239                      |

|                                                       |         |        |         |        |
|-------------------------------------------------------|---------|--------|---------|--------|
| <b>PRIMARY AUDITORY CORTEX</b>                        | 2.0389  | 0.0449 | 0.0425  | 0.9805 |
| <b>DORSOLATERAL ENTORHINAL CORTEX</b>                 | 2.7990  | 0.0457 | -0.4842 | 0.8237 |
| <b>FACIAL NERVE (CRANIAL NERVE 7)</b>                 | -3.5496 | 0.0457 | -0.8996 | 0.8039 |
| <b>MEDIAL ENTORHINAL CORTEX</b>                       | 2.2699  | 0.0449 | -0.0160 | 0.8039 |
| <b>INTERNAL CAPSULE</b>                               | -1.1202 | 0.0449 | -0.1370 | 0.8237 |
| <b>INSULAR REGION: NOT SUBDIVIDED</b>                 | 3.0023  | 0.0457 | -1.4650 | 0.3051 |
| <b>MEDIAL SEPTUM</b>                                  | -0.9700 | 0.0486 | 0.0516  | 0.8237 |
| <b>INSULAR REGION: NOT SUBDIVIDED</b>                 | 3.0023  | 0.0457 | -1.4650 | 0.3051 |
| <b>MEDIAL SEPTUM</b>                                  | -0.9700 | 0.0486 | 0.0516  | 0.8237 |
| <b>SECONDARY AUDITORY CORTEX: VENTRAL AREA</b>        | 1.2868  | 0.0615 | -0.1850 | 0.9805 |
| <b>FASCICULUS RETROFLEXUS</b>                         | -2.4414 | 0.0615 | 0.8117  | 0.9081 |
| <b>SLU</b>                                            | 0.9989  | 0.1588 | 0.7993  | 0.6975 |
| <b>PRIMARY SOMATOSENSORY CORTEX: UPPER LIP REGION</b> | 0.8457  | 0.1588 | 0.9299  | 0.6975 |
| <b>SUBPENDYMALE ZONE / RHINOCELE</b>                  | -2.1028 | 0.1932 | -0.8214 | 0.6572 |
| <b>CA3RAD</b>                                         | 1.1479  | 0.3220 | 0.5122  | 0.6572 |
| <b>POSTERIOR COMMISSURE</b>                           | 1.2645  | 0.3429 | 0.8172  | 0.6572 |
| <b>STRIA MEDULLARIS</b>                               | -0.3826 | 0.4300 | -0.9390 | 0.3703 |
| <b>LOBULE 1-2 WHITE MATTER</b>                        | -1.0779 | 0.6963 | -1.8440 | 0.3703 |
